# Supplementary material for: HER-2 and HER-3 expression in liver metastases of patients with colorectal cancer
Source: PubMed Central journal article supplement (PMC4558136; doi:10.18632/oncotarget.3527), 2015-04-13
Supplement: oncotarget-06-15065-s001.pdf [file oncotarget-06-15065-s001.pdf]

## SUPPLEMENTARY TABLE

Supplementary Table S1: Systemic Treatment

| Treatment                                      | <i>N</i> = 208 | %    |
|------------------------------------------------|----------------|------|
| <b>Surgery</b>                                 |                |      |
| Yes                                            | 179            | 86   |
| No (unresectable)                              | 29             | 14   |
| <b>Surgical procedure (<i>n</i> = 179)</b>     |                |      |
| Major liver surgery                            | 102            | 57   |
| Minor liver surgery                            | 77             | 43   |
| <b>Synchron metastases (<i>n</i> = 118)</b>    |                |      |
| <b>Chemotherapy</b>                            |                |      |
| 5-FU mono                                      | 29             | 25   |
| 5-FU + oxaliplatin                             | 61             | 52   |
| 5-FU + irinotecan                              | 15             | 13   |
| No chemotherapy                                | 13             | 11   |
| <b>Second-line chemotherapy</b>                |                |      |
| 5-FU mono                                      | 3              | 3    |
| 5-FU + oxaliplatin                             | 11             | 9    |
| 5-FU + irinotecan                              | 27             | 23   |
| No second-line chemotherapy                    | 77             | 65   |
| <b>Metachronous metastases (<i>n</i> = 90)</b> |                |      |
| <b>Chemotherapy</b>                            |                |      |
| 5-FU mono                                      | 11             | 12   |
| 5-FU + oxaliplatin                             | 25             | 28   |
| 5-FU + irinotecan                              | 15             | 17   |
| No chemotherapy                                | 39             | 43   |
| <b>Second-line chemotherapy</b>                |                |      |
| 5-FU mono                                      | 0              | -    |
| 5-FU + oxaliplatin                             | 8              | 9    |
| 5-FU + irinotecan                              | 6              | 7    |
| No second-line chemotherapy                    | 76             | 84   |
| <b>Biological agents</b>                       |                |      |
| Cetuximab                                      | 25             | 12   |
| Bevacizumab                                    | 24             | 12   |
| Cetuximab + bevacizumab                        | 6              | 3    |
| Cetuximab + bevacizumab<br>+ panitumumab       | 1              | 0.05 |
| None                                           | 152            | 73   |
